# Supplementary material for: Altered gut microbiota in older adults with mild cognitive impairment: a case-control study
Source: PubMed Central journal article supplement (PMC10281289; doi:10.3389/fnagi.2023.1162057), 2023-05-25
Supplement: Table_1.pdf [file Table_1.pdf]

## *Supplementary Material*

### **Altered Gut Microbiota in Older Adults with Mild Cognitive Impairment: a Case-Control study**

**Kang-Chen Fan, Chen-Ching Lin, Yi-Chien Liu, Yi-Ping Chao, Yen-Jun Lai, Yen-Ling Chiu, Yi-Fang Chuang\***

\* **Correspondence:** Yi-Fang Chuang: [chuangy@nycu.edu.tw](mailto:chuangy@nycu.edu.tw)

#### **1 Supplementary Figures and Tables**

##### **1.1 Supplementary Tables**

|            |               | MCI<br>n=31 |        | Normal<br>n=65 |        |
|------------|---------------|-------------|--------|----------------|--------|
| <i>Age</i> |               | Male        | Female | Male           | Female |
| Urban      | <i>&lt;75</i> | 7           | 5      | 12             | 12     |
|            | <i>≥75</i>    | 5           | 3      | 7              | 12     |
| Rural      | <i>&lt;75</i> | 3           | 5      | 5              | 6      |
|            | <i>≥75</i>    | 1           | 2      | 7              | 4      |

**Supplementary Table 1.** The exact numbers of cases and controls in each stratum.

| Reads  | Input    | Filtered | %    | Denoised<br>Forward | %    | Denoised<br>Reverse | %    | Merged   | %    | Nonchimeric | %    |
|--------|----------|----------|------|---------------------|------|---------------------|------|----------|------|-------------|------|
| MCI    | 155109.8 | 117792.3 | 77.5 | 116701.8            | 76.7 | 116793.4            | 76.8 | 111374.5 | 73.1 | 99771.4     | 65.5 |
| Normal | 122941.7 | 96982.6  | 80.5 | 95980.8             | 79.6 | 96087.4             | 79.7 | 91025.8  | 75.4 | 81194.4     | 67.4 |
| Total  | 133329.3 | 103702.4 | 79.5 | 102671.9            | 78.7 | 102773.7            | 78.8 | 97596.7  | 74.7 | 87193.2     | 66.8 |

**Supplementary Table 2.** DADA2 denoising process of 16S rRNA reads.

|                            | MCI            |         |                |         |                 |         |
|----------------------------|----------------|---------|----------------|---------|-----------------|---------|
|                            | Model 1*       |         | Model 2†       |         | Model3‡         |         |
|                            | β (SE)         | p-value | β (SE)         | p-value | β (SE)          | p-value |
| <i>Richness indices</i>    |                |         |                |         |                 |         |
| Observed                   | -6.1 (16.6)    | 0.71    | -7.5 (15.3)    | 0.62    | -2.2 (16.4)     | 0.89    |
| Chao1                      | -5.8 (16.7)    | 0.73    | -7.3 (15.4)    | 0.64    | -2.2 (16.6)     | 0.89    |
| <i>α-diversity indices</i> |                |         |                |         |                 |         |
| Shannon                    | -0.1 (0.1)     | 0.33    | -0.1 (0.1)     | 0.30    | -0.05 (0.1)     | 0.65    |
| Simpson                    | -0.003 (0.007) | 0.62    | -0.003 (0.007) | 0.65    | 0.0004 (0.0009) | 0.95    |
| InvSimpson                 | -3.3 (2.9)     | 0.26    | -3.3 (2.8)     | 0.24    | -2.7 (3.0)      | 0.36    |

\* Model 1: unadjusted

† Model 2: adjusted for age, gender, community (urban and rural)

‡ Model 3: adjusted for age, gender, community (urban and rural), education level ( $\leq 9$  and  $> 9$  years), hypertension

**Supplementary Table 3.** The association between MCI and richness /  $\alpha$ -diversity indices.

| PERMANOVA |                 |                  |                |          |         |              | Wd*     |             |
|-----------|-----------------|------------------|----------------|----------|---------|--------------|---------|-------------|
| Df        | Distance Method | Sum Sq           | R <sup>2</sup> | Pseudo-F | p-value | Statistic    | p-value |             |
| MCI       | 1               | Bray-Curtis      | 0.317          | 0.011    | 1.089   | 0.25         | 1.07    | 0.25        |
|           |                 | Jaccard          | 0.390          | 0.011    | 1.046   | 0.23         | 1.04    | 0.28        |
|           |                 | UniFrac          | 0.414          | 0.018    | 1.709   | <b>0.006</b> | 1.57    | <b>0.02</b> |
|           |                 | Weighted UniFrac | 0.020          | 0.010    | 0.921   | 0.47         | 0.79    | 0.68        |

**Supplementary Table 4.** PERMANOVA and Wd\* test of beta-diversity

| Volume, cm <sup>3</sup> , mean ± SD | MCI<br>n = 26 | Normal<br>n = 64 | p-value |
|-------------------------------------|---------------|------------------|---------|
| Total brain                         | 999.2 ± 131.1 | 1035.0 ± 98.3    | 0.16    |
| Ventricle                           | 35.5 ± 11.8   | 32.5 ± 12.4      | 0.29    |
| Gray matter                         | 407.9 ± 48.2  | 422.8 ± 39.9     | 0.13    |
| White matter                        | 411.0 ± 66.7  | 431.5 ± 53.9     | 0.13    |
| Hippocampus                         | 7.5 ± 1.0     | 7.8 ± 0.8        | 0.15    |
| Entorhinal                          | 3.5 ± 0.9     | 3.7 ± 0.6        | 0.36    |
| Amygdala                            | 2.9 ± 0.5     | 3.0 ± 0.4        | 0.38    |

  

| Thickness, cm, mean ± SD | MCI<br>n = 26 | Normal<br>n = 64 | p-value |
|--------------------------|---------------|------------------|---------|
| AD-score                 | 2.5 ± 0.15    | 2.5 ± 0.11       | 0.53    |

**Supplementary Table 5.** Characteristics of brain structure between MCIs and cognitively normal adults.

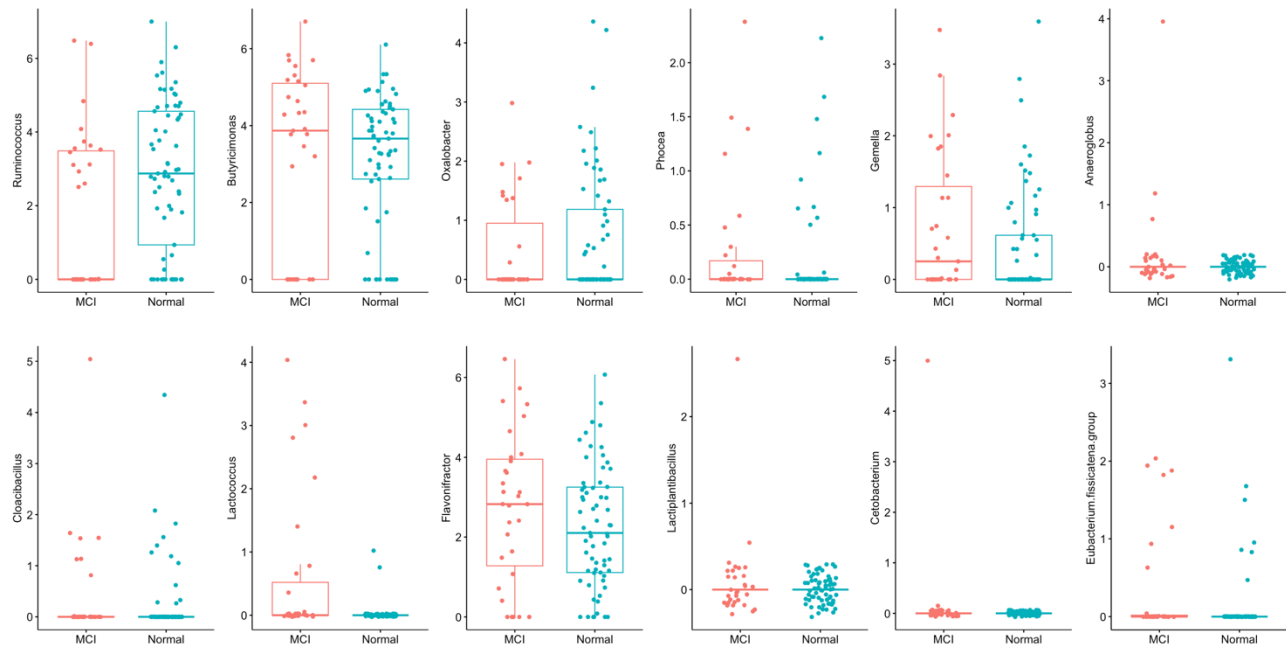

**Supplementary Figure 1.** Centred-log ratio (CLR) transformed relative abundances of genera different between MCIs and cognitively normal adults, which were identified by linear discriminant analysis (LDA) effect size (LEfSe).
